# Supplementary material for: Expression and Function of Hypoxia Inducible Factor‐1α and Vascular Endothelial Growth Factor in Pulp Tissue of Teeth under Orthodontic Movement
Source: Hindawi journal article supplement (doi:10.1155/2015/215761), 2015-01-01
Supplement: f1 [file 215761.f1.zip]

Archive with 3 entries (2 files):
- 215761.f1/
- 215761.f1/description of supplementary materials.docx
- 215761.f1/mat.215761.v2.docx
